# Supplementary material for: Prevalence of migraine in Iran: a systematic review and meta-analysis
Source: PubMed Central journal article supplement (PMC10134641; doi:10.1186/s12883-023-03215-5), 2023-04-27
Supplement: 12883_2023_3215_MOESM1_ESM.pdf [file 12883_2023_3215_MOESM1_ESM.pdf]

Appendix 1: search strategy

| Database       | Search strategy                                                                                                                                                                                                                                                                                                                                                                                                                                                                                                                                                                          | Date       | Number |
|----------------|------------------------------------------------------------------------------------------------------------------------------------------------------------------------------------------------------------------------------------------------------------------------------------------------------------------------------------------------------------------------------------------------------------------------------------------------------------------------------------------------------------------------------------------------------------------------------------------|------------|--------|
| PubMed         | (prevalence[Title/Abstract] OR rate[Title/Abstract] OR outbreak[Title/Abstract] OR epidemiology[Title/Abstract] OR burden[Title/Abstract]) AND ("Migraine Disorder"[Title/Abstract] OR Migraine[Title/Abstract] OR "Migraine Headache"[Title/Abstract] OR "Acute Confusional Migraine"[Title/Abstract] OR "Hemicrania Migraine"[Title/Abstract] OR "Migraine Variant"[Title/Abstract] OR "Sick Headache"[Title/Abstract] OR "Abdominal Migraine"[Title/Abstract] OR "Cervical Migraine Syndrome"[Title/Abstract]) AND (iran[Title/Abstract] OR Islamic Republic of Iran[Title/Abstract]) | 2022.11.15 | 39     |
| Science Direct | Title, abstract, keywords: (prevalence OR rate OR outbreak) AND ("Migraine Disorder" OR Migraine OR "Migraine Headache" OR "Acute Confusional Migraine" ) AND (iran OR Islamic Republic of Iran)                                                                                                                                                                                                                                                                                                                                                                                         | 2022.11.15 | 2      |
| Scopus         | TITLE-ABS-KEY(prevalence OR rate OR outbreak OR epidemiology OR burden) AND TITLE-ABS-KEY("Migraine Disorder" OR Migraine OR "Migraine Headache" OR "Acute Confusional Migraine" OR "Hemicrania Migraine" OR "Migraine Variant" OR "Sick Headache" OR "Abdominal Migraine" OR "Cervical Migraine Syndrome") AND TITLE-ABS-KEY(iran OR Islamic Republic of Iran)                                                                                                                                                                                                                          | 2022.11.15 | 2      |
| Web of science | TS=(prevalence OR rate OR outbreak OR epidemiology OR burden) AND TS=("Migraine Disorder" OR Migraine OR "Migraine Headache" OR "Acute Confusional Migraine" OR "Hemicrania Migraine" OR "Migraine Variant" OR "Sick Headache" OR "Abdominal Migraine" OR "Cervical Migraine Syndrome") AND TS=(iran OR Islamic Republic of Iran)                                                                                                                                                                                                                                                        | 2022.11.15 | 79     |
| SID *          | Prevalence AND (migraine OR headache)                                                                                                                                                                                                                                                                                                                                                                                                                                                                                                                                                    | 2022.11.15 | 13     |
| Mag Iran*      | Prevalence AND (migraine OR headache)                                                                                                                                                                                                                                                                                                                                                                                                                                                                                                                                                    | 2022.11.15 | 27     |

\*: Due to the fact that the supplementary file must be in English only, the English equivalent of the words is mentioned in the Iranian databases
